# Supplementary material for: The Hepatokine RBP4 Links Metabolic Diseases to Articular Inflammation
Source: MDPI journal article supplement (doi:10.3390/antiox13010124), 2024-01-19
Supplement: s1 [file s1]

**Supplementary Table S2.** Summary of the ten best results of the molecular docking, showing the different molecular interactions and their values together with a final score. Results are sorted from best to worse.

| Rank | Conformation | Electrostatics | Desolvation | Van de Waals | Total   |
|------|--------------|----------------|-------------|--------------|---------|
| 1    | 1089         | -26.82         | -11.39      | 40.965       | -34.663 |
| 2    | 9761         | -2.716         | -35.838     | 64.735       | -32.080 |
| 3    | 164          | -21.208        | -11.412     | 9.707        | -31.649 |
| 4    | 621          | -12.543        | -25.773     | 81.316       | -30.185 |
| 5    | 2154         | -19.775        | -13.079     | 36.503       | -29.203 |
| 6    | 8672         | -11.493        | -18.650     | 12.732       | -28.870 |
| 7    | 8171         | 1.521          | -37.182     | 71.976       | -28.463 |
| 8    | 5027         | -6.405         | -24.281     | 31.853       | -27.501 |
| 9    | 6341         | -22.029        | -10.423     | 58.914       | -26.560 |
| 10   | 8626         | -3.512         | -32.986     | 102.654      | -26.233 |
