# Supplementary material for: The Hepatokine RBP4 Links Metabolic Diseases to Articular Inflammation
Source: MDPI journal article supplement (doi:10.3390/antiox13010124), 2024-01-19
Supplement: s1 [file s1]

**Supplementary Table S1.** Primers used for both mouse and human for all the RT-PCRs performed.

| Mouse primers                            |        |                        |                        |
|------------------------------------------|--------|------------------------|------------------------|
| Gene                                     | Symbol | Forward primer         | Reverse primer         |
| Interleukin 6                            | IL6    | AAGAAATGATGGATGCTACC   | GAGTTTCTGTATCTCTCTGAAG |
| Vascular cell adhesion molecule          | VCAM   | ACTGATTATCCAAGTCTCTCC  | CCATCCACAGACTTTAATACC  |
| Intercellular Adhesion Molecule 1        | ICAM   | CAGTCTACAACCTTTTCAGCTC | CACACTTCACAGTTACTTGG   |
| C-C Motif Chemokine Ligand 2             | CCL2   | CAAGATGATCCCAATGAGTAG  | TTGGTGACAAAACTACAGC    |
| Nicotinamide Phosphoribosyltransferase   | NAMPT  | CAAGAGATTGTAGAGGGAATG  | TCTCGGGTTAACTTCTGTAG   |
| Nitric Oxide Synthase 2                  | NOS2   | CATCAACCAGTATTATGGCTC  | TTTCCTTTGTTACAGCTTCC   |
| Retinol binding protein 4                | RBP4   | AATGGTTACTGTCAAAGCAG   | AATAGAGATGAAGACCGGATG  |
| Hypoxanthine Phosphoribosyltransferase 1 | HPRT   | AGGGATTTGAATCACGTTTG   | TTTACTGGCAACATCAACAG   |
| Matrix Metallopeptidase 1                | MMP1   | CAAGTCCGCTATTTCAAAGG   | ACATGTGGTCAACAAAGAAG   |
| Matrix Metallopeptidase 3                | MMP3   | CTTTAGAGGGGAGAAAATTC   | CATCATCATAACTCCACACG   |
| Matrix Metallopeptidase 9                | MMP9   | CTTCCAGTACCAAGACAAAG   | ACCTTGTTACCTCATTTTG    |
| Human primers                            |        |                        |                        |
| Gene                                     | Symbol | Forward primer         | Reverse primer         |
| Interleukin 6                            | IL6    | GCAGAAAAAGGCCAAAGAATC  | CTACATTTGCCGAAGAGC     |
| Vascular cell adhesion molecule          | VCAM   | ACTTGATGTTCAAGGAAGAG   | TCCAGTTGAACATATCAAGC   |
| Intercellular Adhesion Molecule 1        | ICAM   | ACCATCTACAGCTTTCCG     | TCACACTTCACTGTCACC     |
| C-C Motif Chemokine Ligand 2             | CCL2   | AGACTAACCCAGAAACATCC   | ATTGATTGCATCTGGCTG     |
| Nicotinamide Phosphoribosyltransferase   | NAMPT  | CTAATGGCCTTGGGATTAAC   | TCCAGTGTAAACAAAATTCCC  |
| Retinol binding protein 4                | RBP4   | CCAGAAAGGAAATGATGACC   | CTTACAATCTTCTGCGCTTC   |
| Hypoxanthine Phosphoribosyltransferase 1 | HPRT   | ATAAGCCAGACTTTGTTGG    | ATAGGACTCCAGATGTTTCC   |
| Matrix Metallopeptidase 1                | MMP1   | AAAGGGAATAAGTACTGGGC   | CAGTGTTTTCTCAGAAAGAG   |
| Matrix Metallopeptidase 3                | MMP3   | GCAGTTAGAGAACATGGAG    | ACGAGAAATAAATTGGTCCC   |
| Matrix Metallopeptidase 9                | MMP9   | AAGGATGGGAAGTACTGG     | GCCCAGAGAAGAAGAAAAG    |
| Chemokine (C-X-C motif) ligand 1         | CXCL1  | AACCGAAGTCATAGCCACAC   | CACCACTGAGCTTCCTCCTC   |
| Chemokine (C-X-C motif) ligand 2         | CXCL2  | CCAAACCGAAGTCATAGCCAC  | CTCCTTCAGGAACAGCCACC   |
| Chemokine (C-X-C motif) ligand 8         | CXCL8  | CCACCGGAAGGAACCATCTC   | TTCTCAGCCCTCTTCAAAAACT |
| Chemokine (C-X-C motif) ligand 12        | CXCL12 | CAGCGACGGGAAGCCC       | GTCCTTTTTGGCTGTTGTGCT  |
| Beta-actin                               | ACTB   | CACAGAGCCTCGCCTTTGC    | CCACCATCACGCCCTGG      |
